# Supplementary material
Source: PubMed Central journal article supplement (PMC2758035)
Supplement: NIHMS107813-supplement-1.pdf [file NIHMS107813-supplement-1.pdf]

# **FLOW-MEDIATED VASCULAR REMODELING IN HYPERTENSION: RELATION TO HEMODYNAMICS**

**Ibrahim: Hemodynamics of vascular remodeling in hypertension**

Jamila Ibrahim PhD, Bradford C. Berk MD, PhD  
Cardiovascular Research Institute and Department of Medicine, University of Rochester,  
Rochester,  
NY 14642, USA.

\*To whom correspondence should be addressed:

Bradford C. Berk, MD, PhD

University of Rochester

Cardiovascular Research Institute,

601 Elmwood Ave, Rochester, NY 14642

Phone: 585-273-1946; Fax: 585-273-1497

E-mail: [bradford\\_berk@urmc.rochester.edu](mailto:bradford_berk@urmc.rochester.edu)

**Table 1A.** Baseline systolic blood pressure (SBP) and body weight (BW) in GH and BN rats.

|           |    | 3 days<br>(n=5) | 7 days<br>(n=5) | 28 days<br>(n=8-10) | Sham (28 days)<br>(n=5) |
|-----------|----|-----------------|-----------------|---------------------|-------------------------|
| SBP, mmHg | GH | 151±2.8 **      | 154±2.4 ***     | 155±4.3 ***         | 146±1.7 ***             |
|           | BN | 112±5.1         | 116±2.1         | 107±2.5             | 111±0.7                 |
| BW, g     | GH | 173±4.5         | 179±10.4        | 182±8.2             | 188±13.6                |
|           | BN | 169±9.8         | 177±7.7         | 165±3.9 P=0.05      | 172±10.4                |

Values shown were obtained at day 0 when paired groups of animals (5-10 for each harvest time) were randomly chosen from litters to obtain similar body weights. \*\* P<0.01, \*\*\* P<0.001, GH vs. BN.

**Table 1B.** Baseline carotid arterial characteristics in GH and BN rats.

|                           |    | LCA (low flow)  |                 |                     |                         | RCA (high flow) |                |                     |                         |
|---------------------------|----|-----------------|-----------------|---------------------|-------------------------|-----------------|----------------|---------------------|-------------------------|
|                           |    | 3 days<br>(n=5) | 7 days<br>(n=5) | 28 days<br>(n=8-10) | Sham (28 days)<br>(n=5) | 3 days<br>(n=5) | 7days<br>(n=5) | 28 days<br>(n=8-10) | Sham (28 days)<br>(n=5) |
| BF, ml/min                | GH | 2.59±0.21       | 2.86±0.18       | 2.67±0.19 *         | 2.79±0.22               | 2.77±0.10 **    | 3.37±0.33      | 2.63±0.12**         | 2.92±0.23               |
|                           | BN | 2.85±0.06       | 3.37±0.14       | 2.93±0.09           | 3.67±0.26               | 3.37±0.13       | 3.25±0.16      | 3.16±0.12           | 2.93±0.17               |
| SS, dynes/cm <sup>2</sup> | GH | 13.1±1.31       | 13.9±0.87 *     | 18.9±1.15           | 14.1±1.59               | 14.1±0.52 **    | 15.3±1.36*     | 17.0±1.55           | 13.1±1.03               |
|                           | BN | 16.3±0.60       | 20.6±2.48       | 17.2±1.67           | 22.8±2.98               | 22.8±1.87       | 20.4±1.13      | 19.4±2.26           | 16.0±1.85               |
| OD, mm                    | GH | 1.06±0.01 *     | 1.07±0.03       | 0.94±0.03           | 1.06±0.03               | 1.05±0.02 ***   | 1.09±0.02**    | 0.99±0.03           | 1.10±0.01               |
|                           | BN | 1.01±0.01       | 1.00±0.04       | 1.02±0.03           | 1.00±0.02               | 0.96±0.02       | 0.98±0.03      | 1.01±0.04           | 1.03±0.03               |

Values shown were obtained at day 0 when paired groups of animals (5-10 for each harvest time) were randomly chosen from litters to obtain similar body weights \* P<0.05, \*\* P<0.01, \*\*\* P<0.001, GH vs. BN

**Table 2.** Time-course of carotid media thickness in LCA and RCA (n=5-10 vessels for each time-point).

|                        |    | LCA (low flow) |            |               |                | RCA (high flow) |            |               |                |
|------------------------|----|----------------|------------|---------------|----------------|-----------------|------------|---------------|----------------|
|                        |    | 3 days         | 7 days     | 28 days       | Sham (28 days) | 3 days          | 7days      | 28 days       | Sham (28 days) |
| Media thickness,<br>μm | GH | 39.79±1.98¥¥   | 40.35±0.95 | 46.87±3.82 ¥¥ | 43.62±2.02     | 34.51±3.02      | 35.83±0.96 | 42.53±2.20 ¥¥ | 49.03±2.10     |
|                        | BN | 28.81±0.83     | 41.43±1.90 | 37.61±2.24    | 47.13±4.04 †   | 34.99±0.36      | 33.61±0.98 | 30.35±1.63    | 44.14±5.94 †   |
